# Supplementary material
Source: bioRxiv or medRxiv preprint supplement (https://www.biorxiv.org/highwire/filestream/26280/field_highwire_adjunct_files/0/090399-1.pdf)
Supplement: Supplementary file [file 090399-1.pdf]

**Figure S1. Removal of *mtrB* or replacement of MtrA with MtrA-3xFlag has no effect on *S. venezuelae* growth in liquid medium.** A. Growth curves are *S. venezuelae* wild-type (blue),  $\Delta mtrB$  mutant (red) and complemented mutant (green). Coloured arrows indicate the ChIP-seq time points. B. Growth rate in liquid MYM medium is also unaffected by replacing wild-type MtrA with MtrA-3xFlag in *S. venezuelae*.

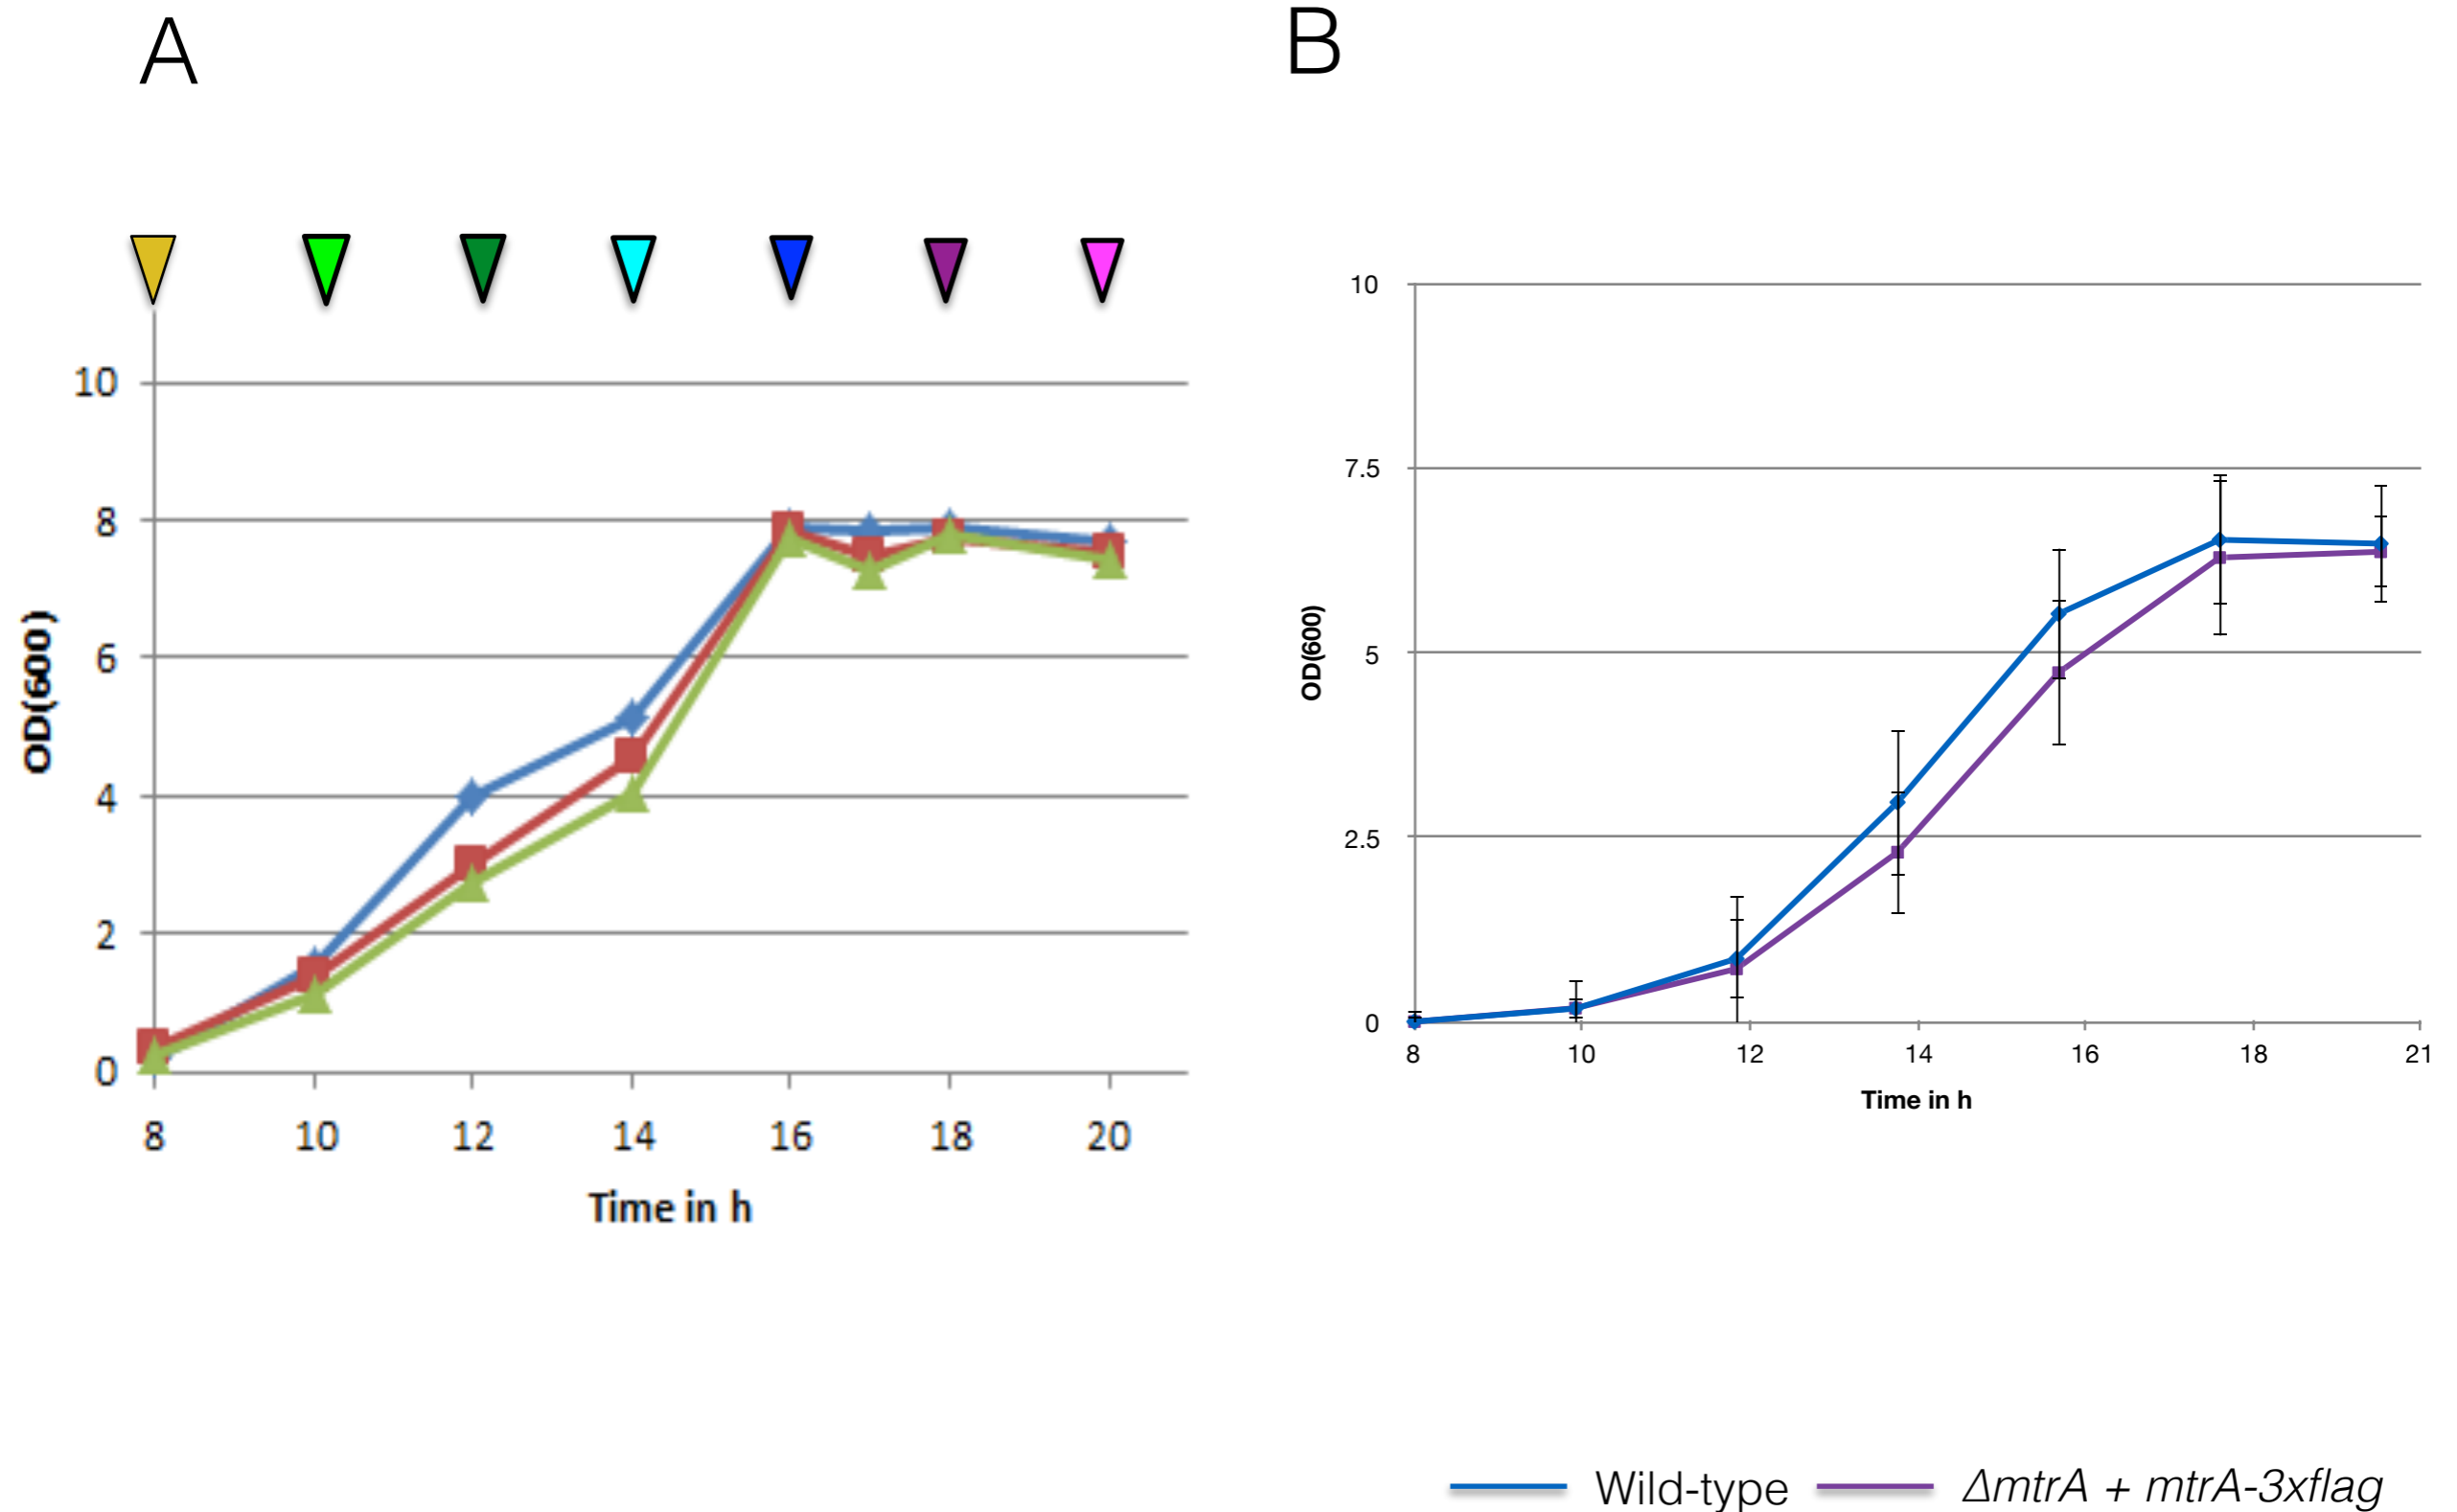

**Figure S2. MtrA expression in *S. venezuelae* NRRL B-65442.** A. Microarray data (EBI ArrayExpress E-MEXP-3612) shows a slight decrease in *mtrA* expression (green) following differentiation of substrate mycelium into aerial hyphae at 14 hours. This is consistent with ChIP- and RNA-seq data which shows that MtrA autoregulates and is active for DNA binding at 10 and 12 hours and down regulated from 14-18 hours. B. Immunoblotting with anti-Flag antibodies shows that MtrA-3xFlag is constitutively expressed from its own promoter. Control panel (*S. ven*, right) shows no cross reaction with anti-Flag antibodies in the wild-type. Coomassie stained SDS PAGE gels show equal protein loading for all samples.

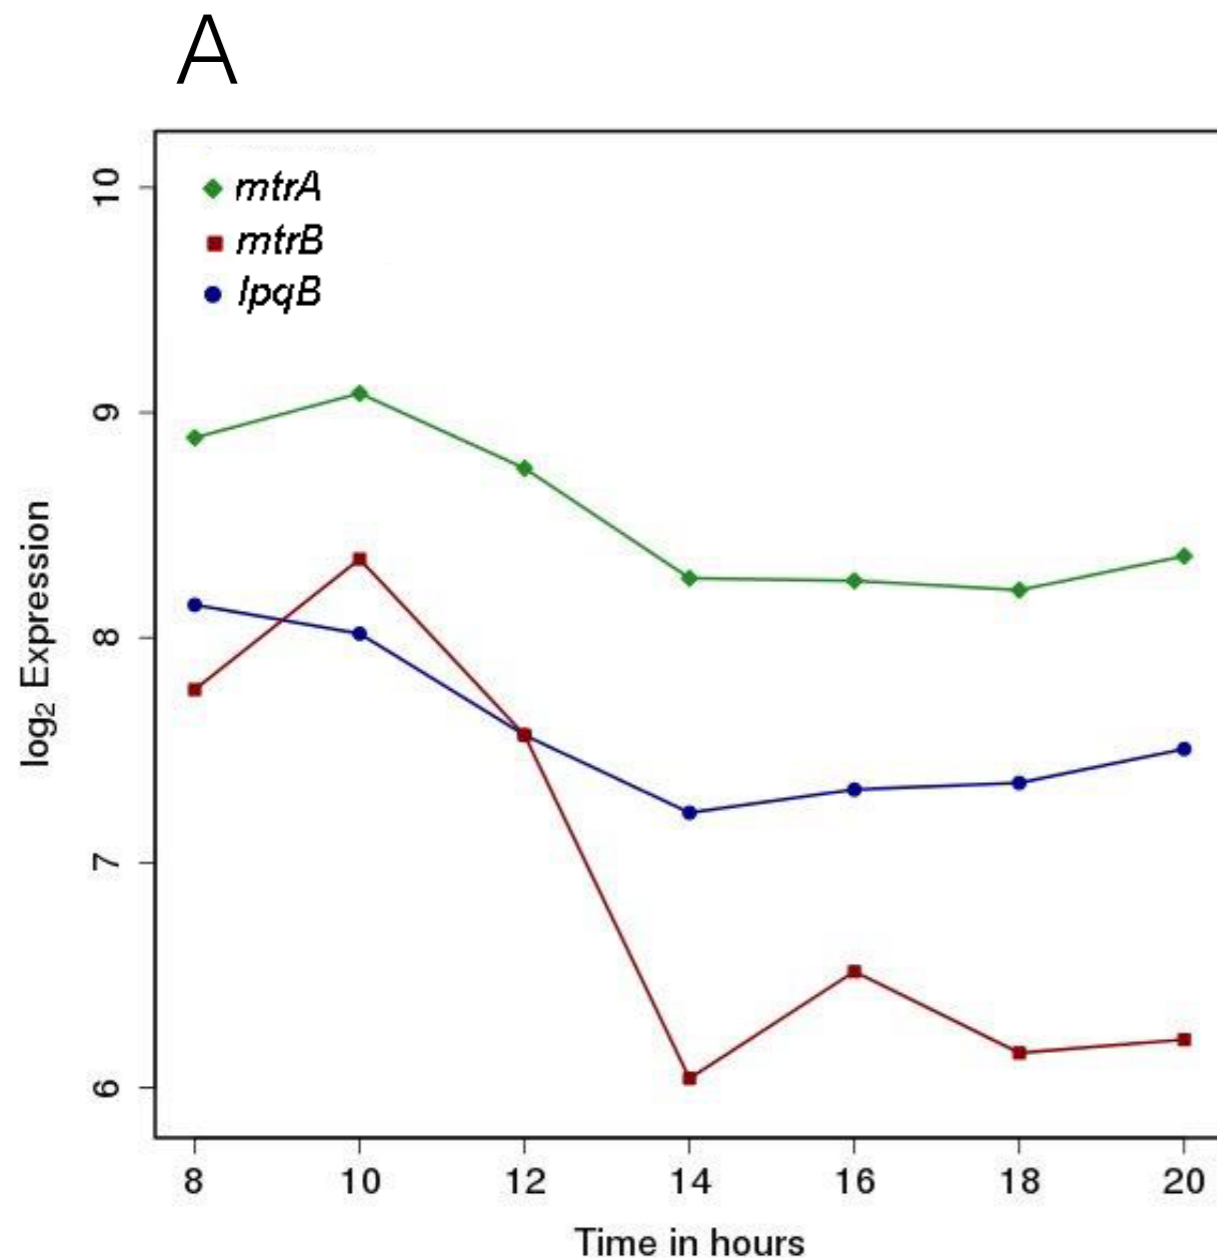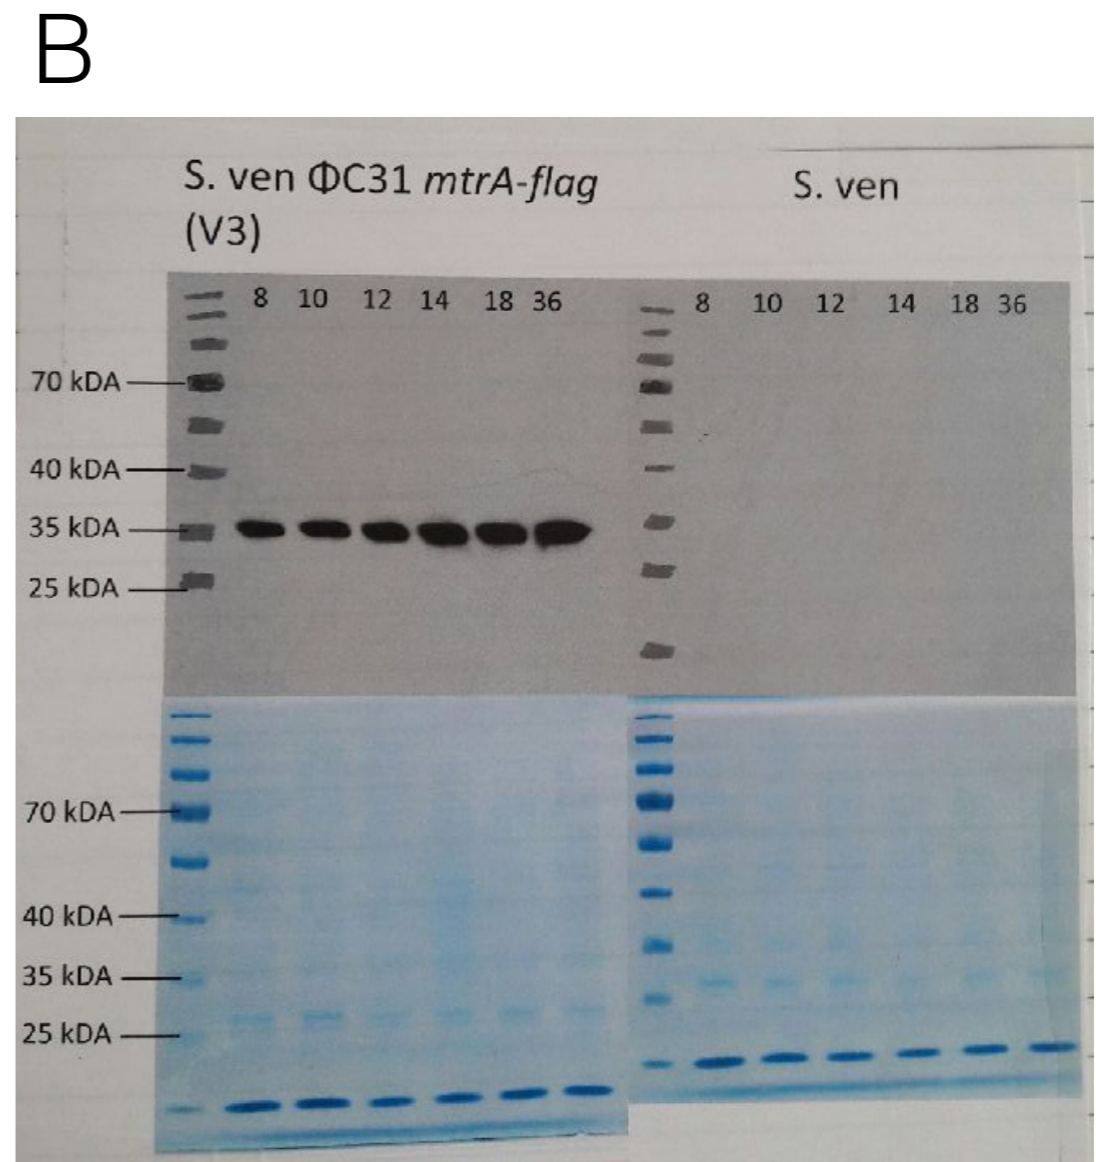

**Figure S3. ChIP-seq during the *S. venezuelae* life cycle.** The peaks show sequences enriched during ChIP-seq experiments against MtrA-3xFlag in *S. venezuelae* at 8, 10, 12, 14, 16, 18 and 20 hours with the wild-type control taken at 18 hours. See Figure S1 for more information about the different stages of growth used in this experiment.

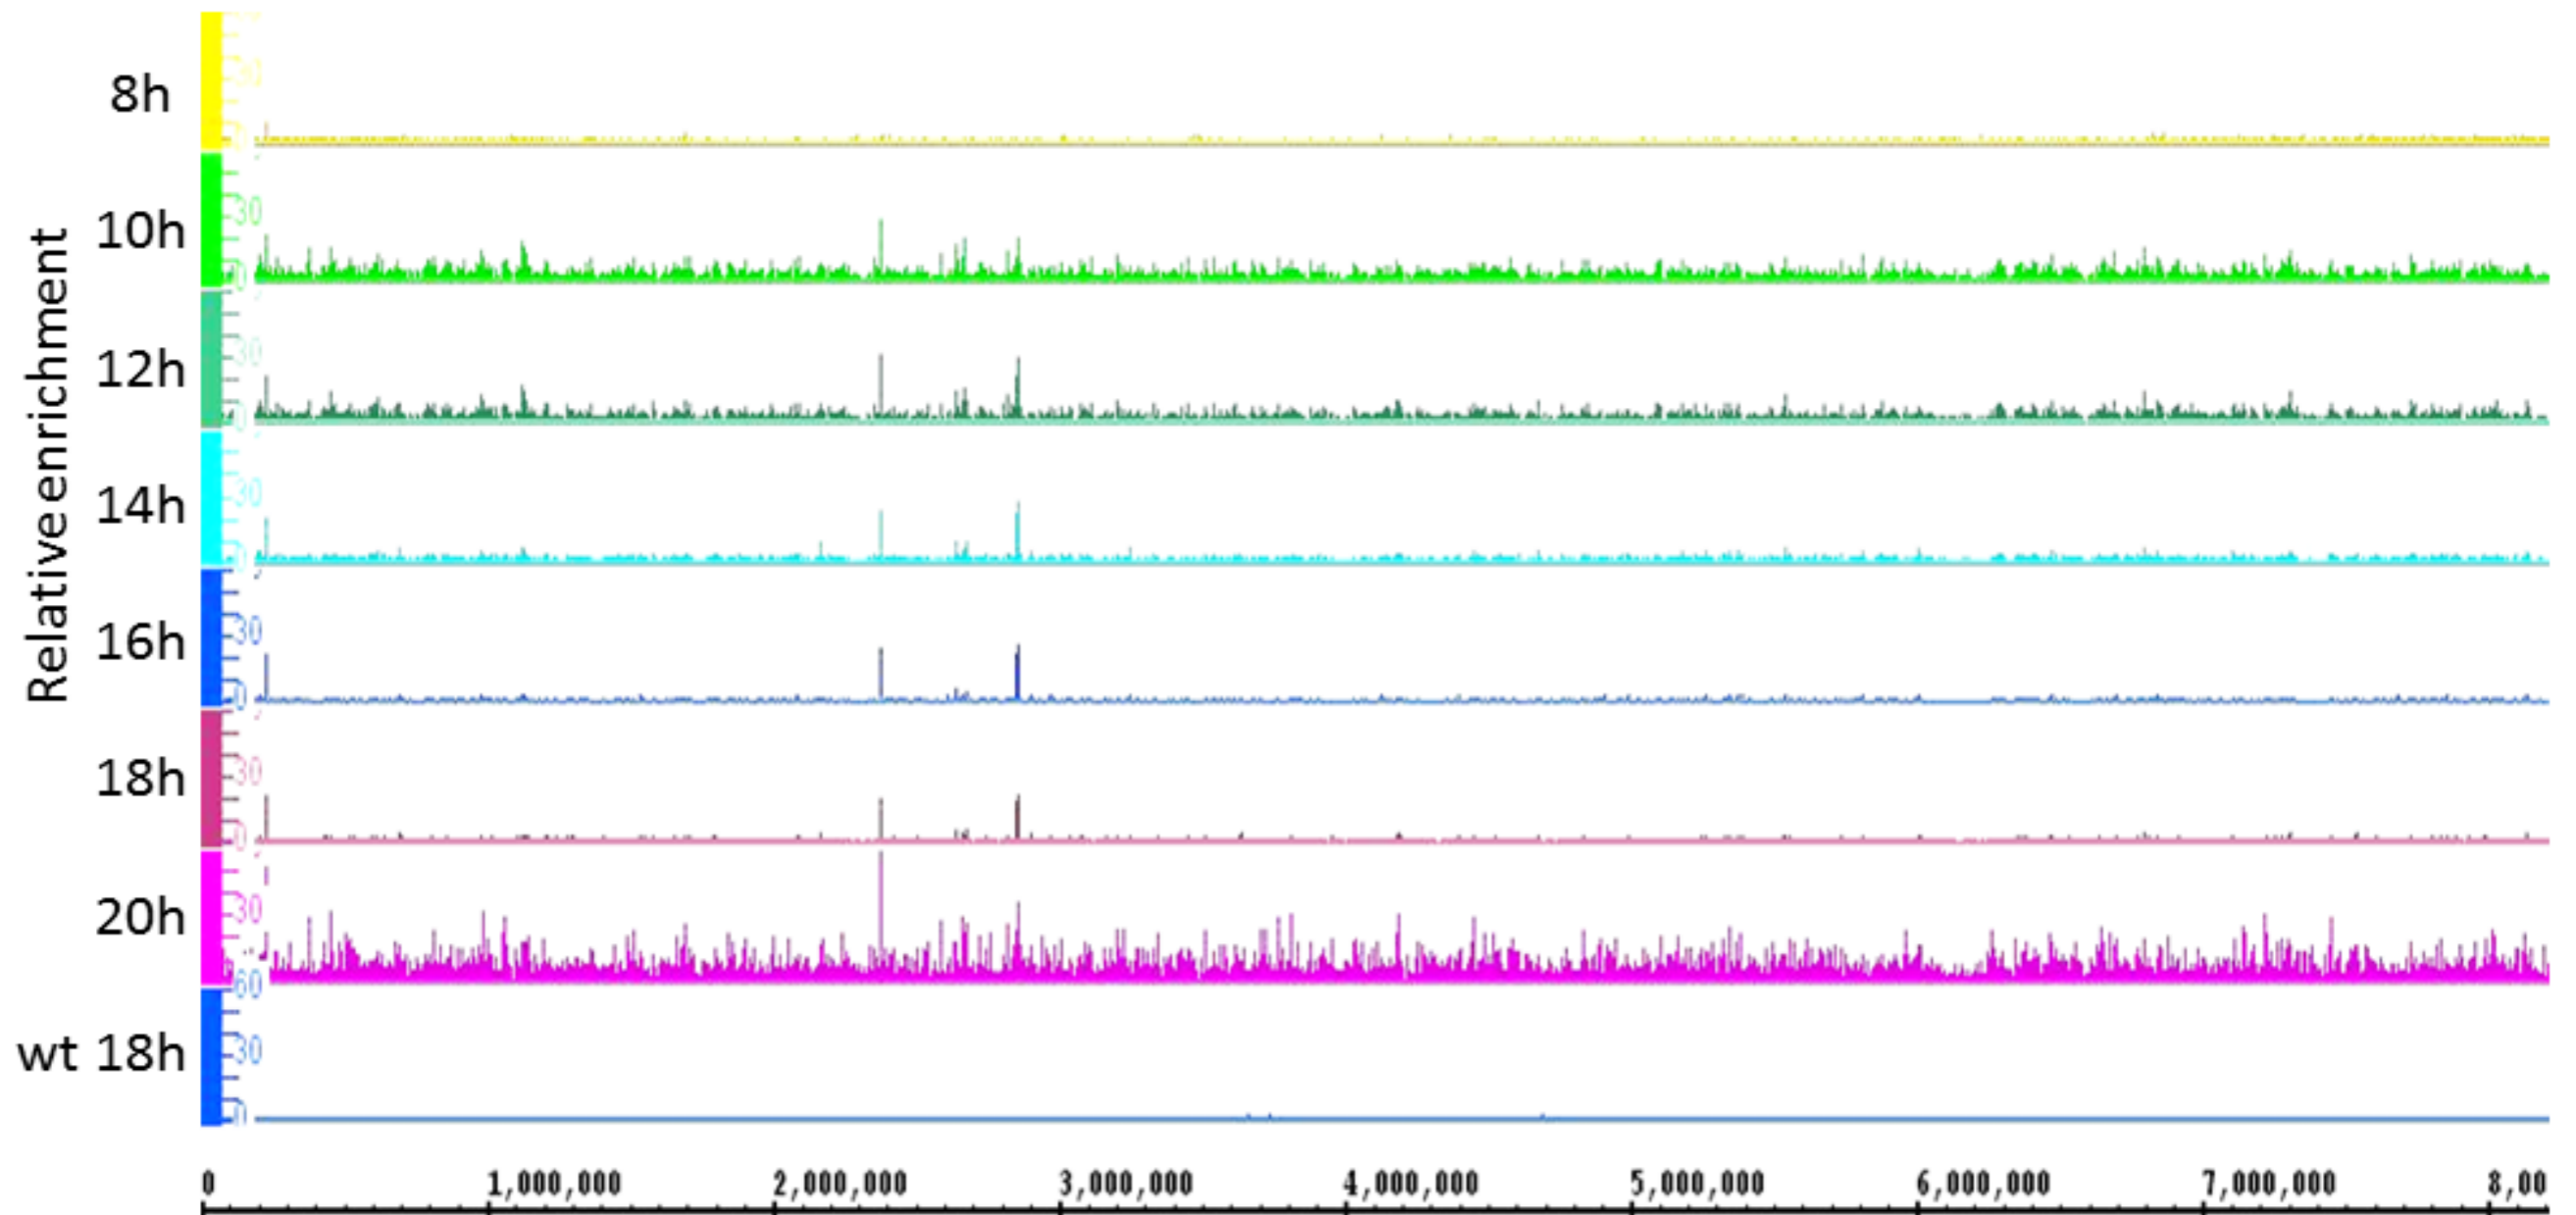

**Figure S4. Deletion of *mtrB* switches on antibacterial activity in *S. venezuelae*.** Left: Bioassays of *S. venezuelae* wild-type (WT),  $\Delta mtrB$  and WT over-expressing *mtrA* from the high level *ermE*\* promoter (*mtrA*\*) against *Bacillus subtilis* shows that only the  $\Delta mtrB$  mutant has antibacterial activity. The immunoblot (top) shows that MtrA is produced in all three strains. Right: Bioassay with filter paper disks soaked in methanol-extracted culture supernatants of the wild-type (WT) and  $\Delta mtrB$  strains and chloramphenicol (Cm) or methanol (MeOH) controls. Zones of inhibition indicate antibacterial activity in the  $\Delta mtrB$  extract and Cm control.

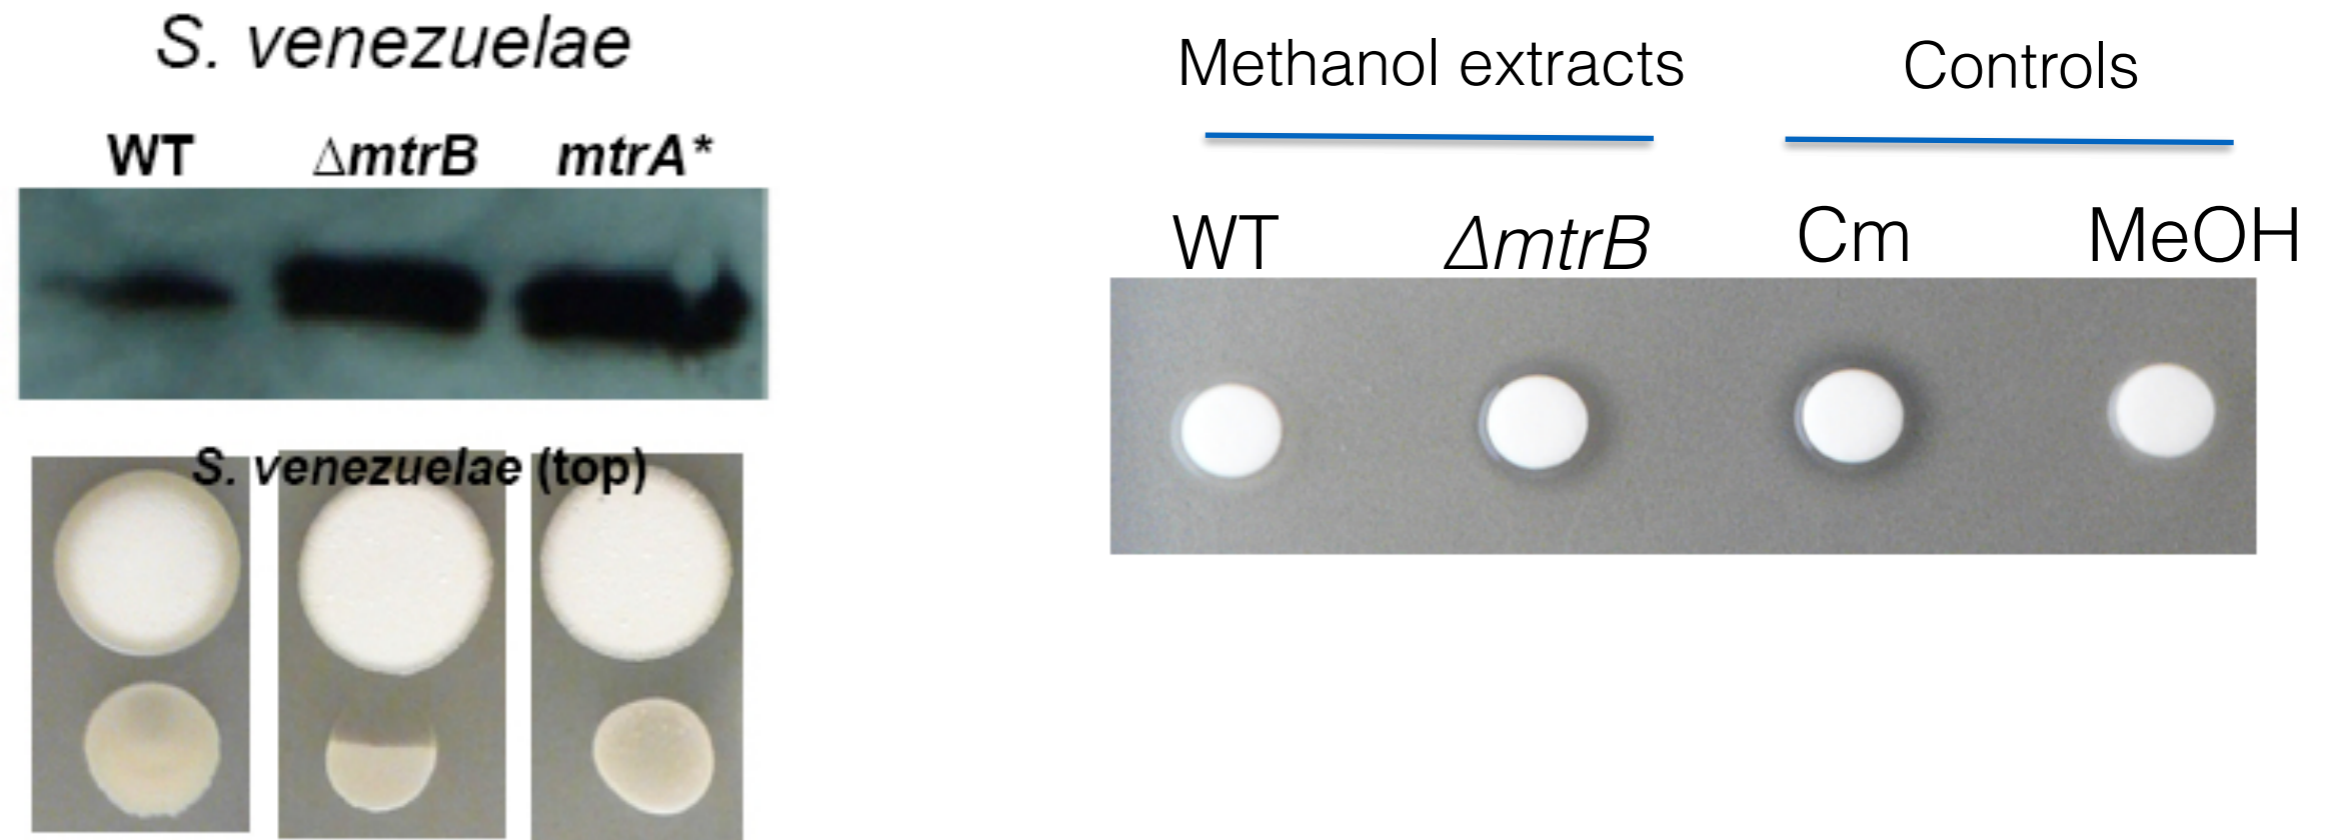

**Figure S5. MtrA directly activates antibiotic production in *S. coelicolor*.** ChIP-seq against MtrA-3xFlag in *S. coelicolor* shows that MtrA binds to the promoters of the cluster specific activator genes *actII-4* and *redZ* and the desferrioxamine repressor gene *desR*. The green line shows the wild type control, black is the 16 hour time point and blue is the 20 hour time point.

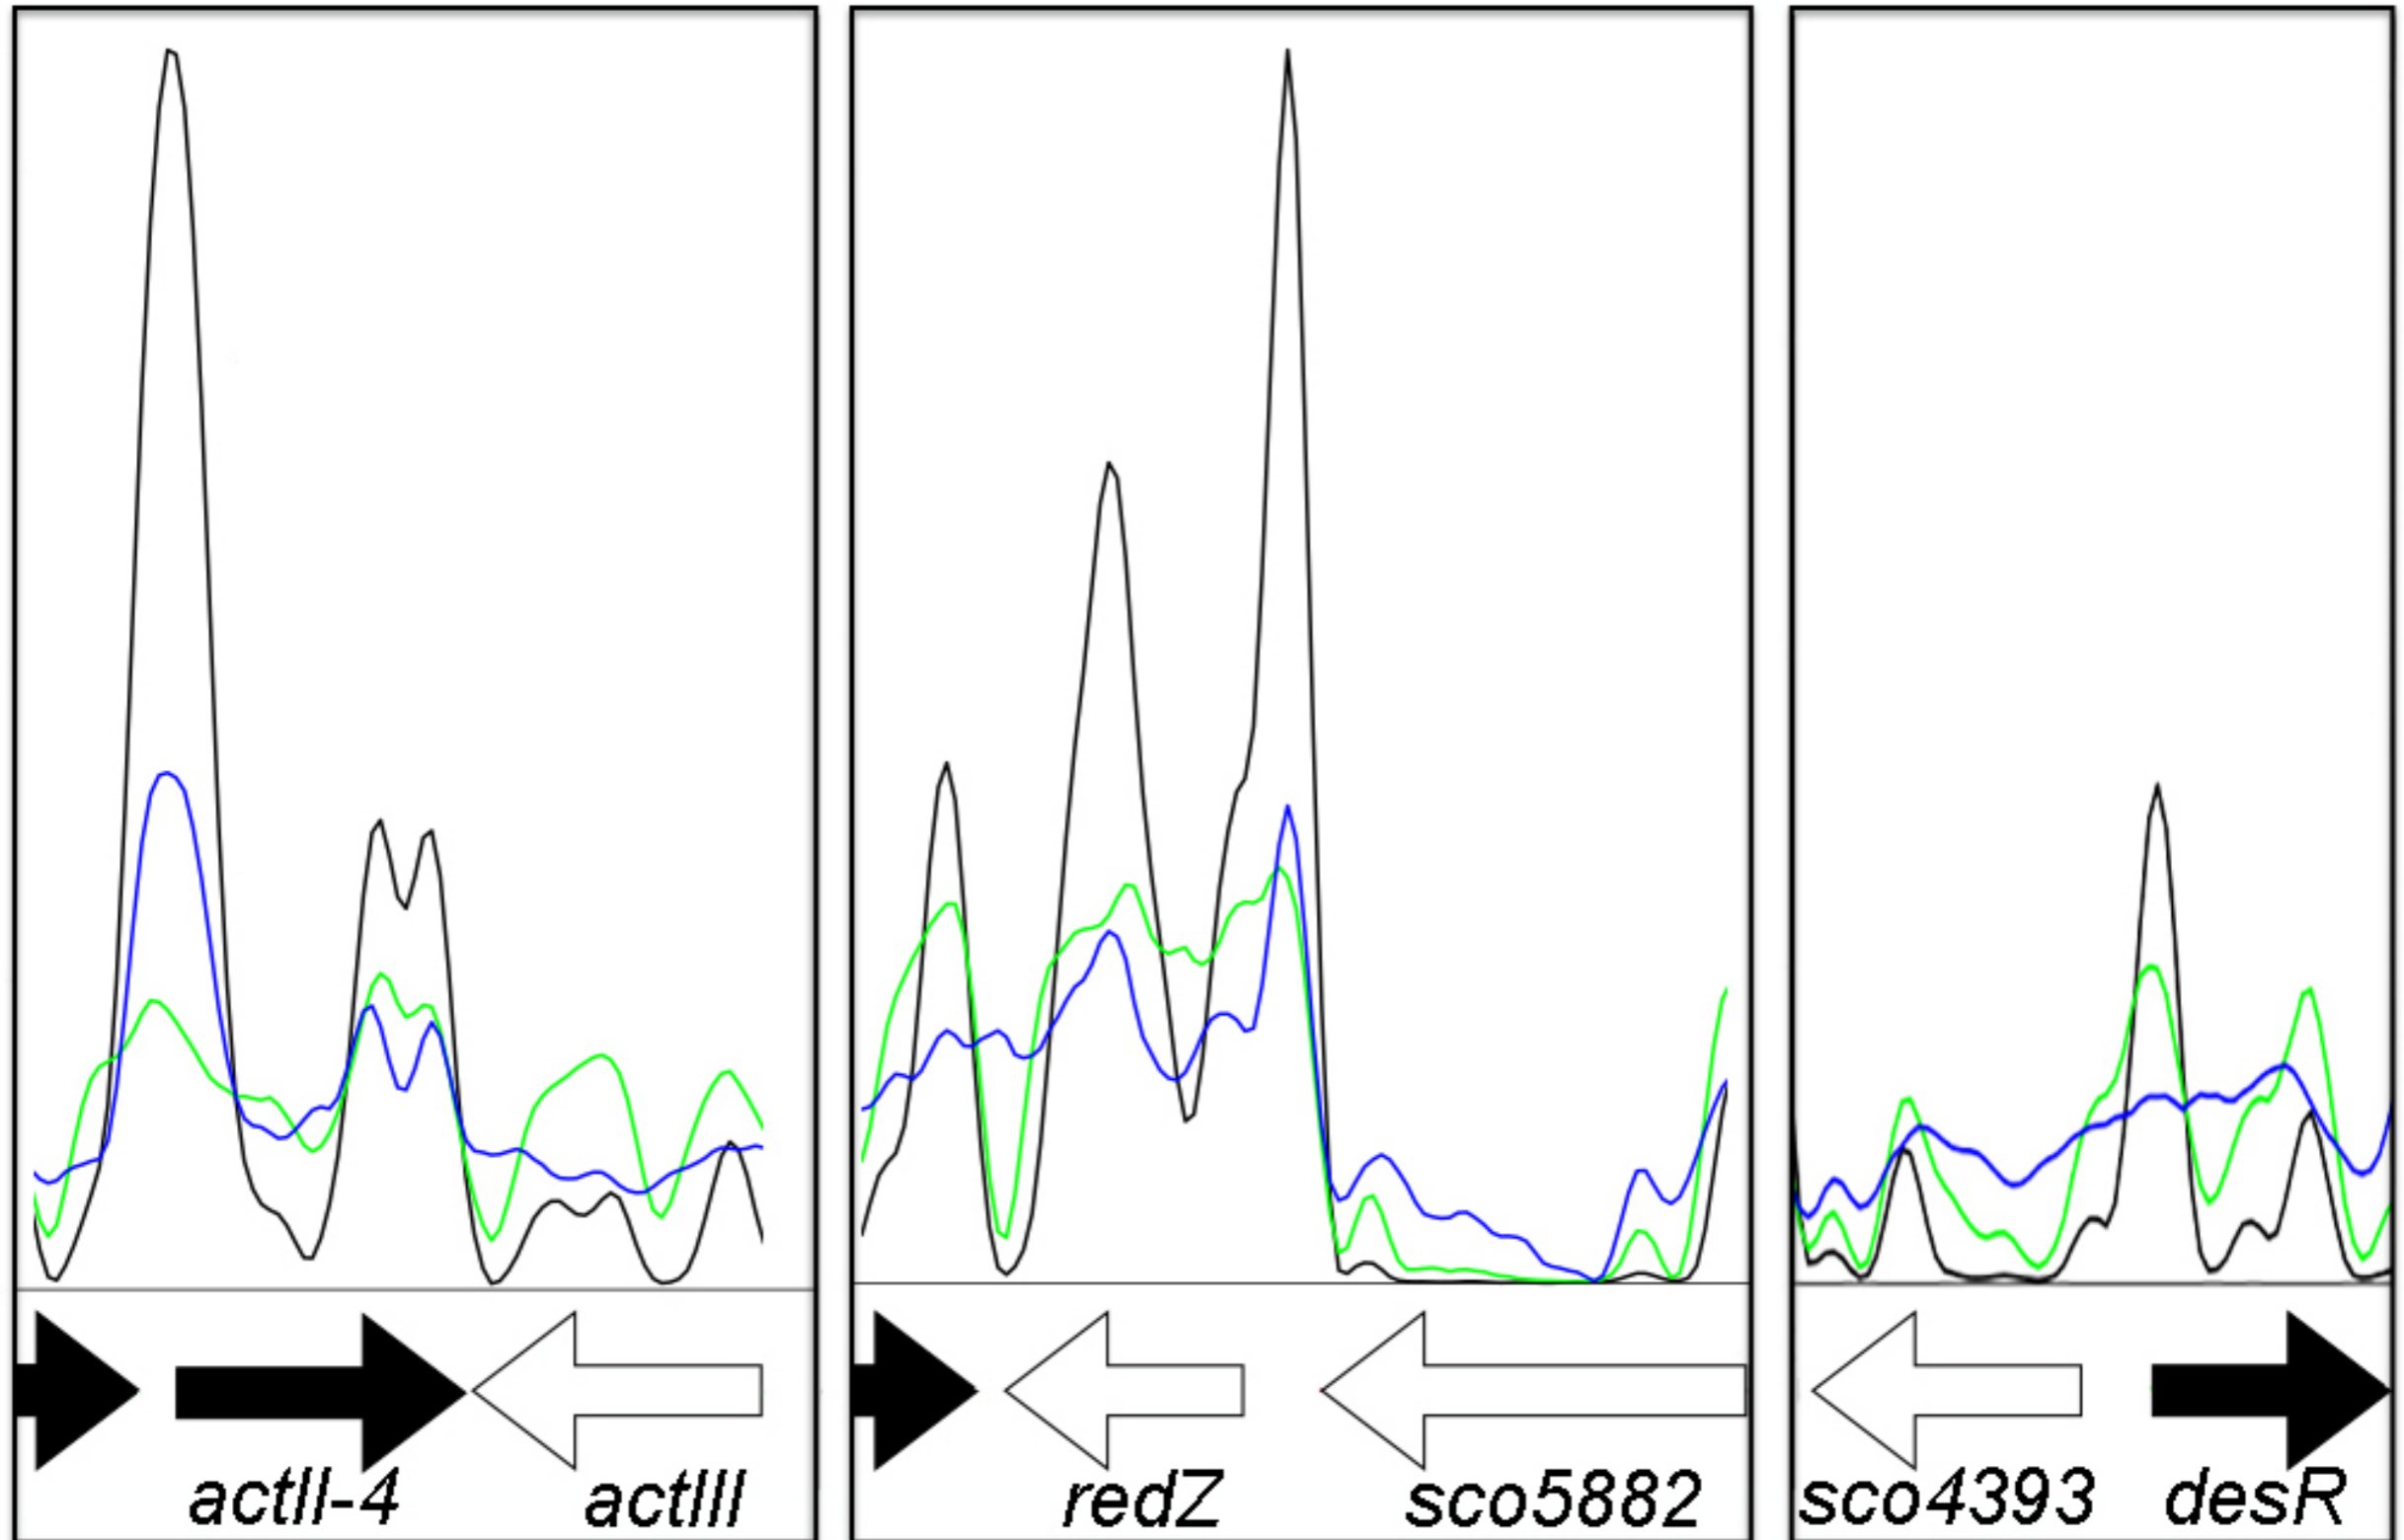

**Figure S6. Structural modelling of Sv-MtrA.** Left: Crystal structure of MtrA(TB). Right: the modelled structure of MtrA(Sv). Bottom: Overlay of MtrA(TB) and MtrA(Sv). The MtrA(TB) structure was obtained from the protein data bank (<http://www.rcsb.org>). Accession number for MtrA(TB) is 2GWR. The structure of MtrA(Sv) was modelled with <https://toolkit.tuebingen.mpg.de/hhpred> and <http://www.sbg.bio.ic.ac.uk/~phyre2>. Both models were similar and for simplicity only the phyre2 model is shown.

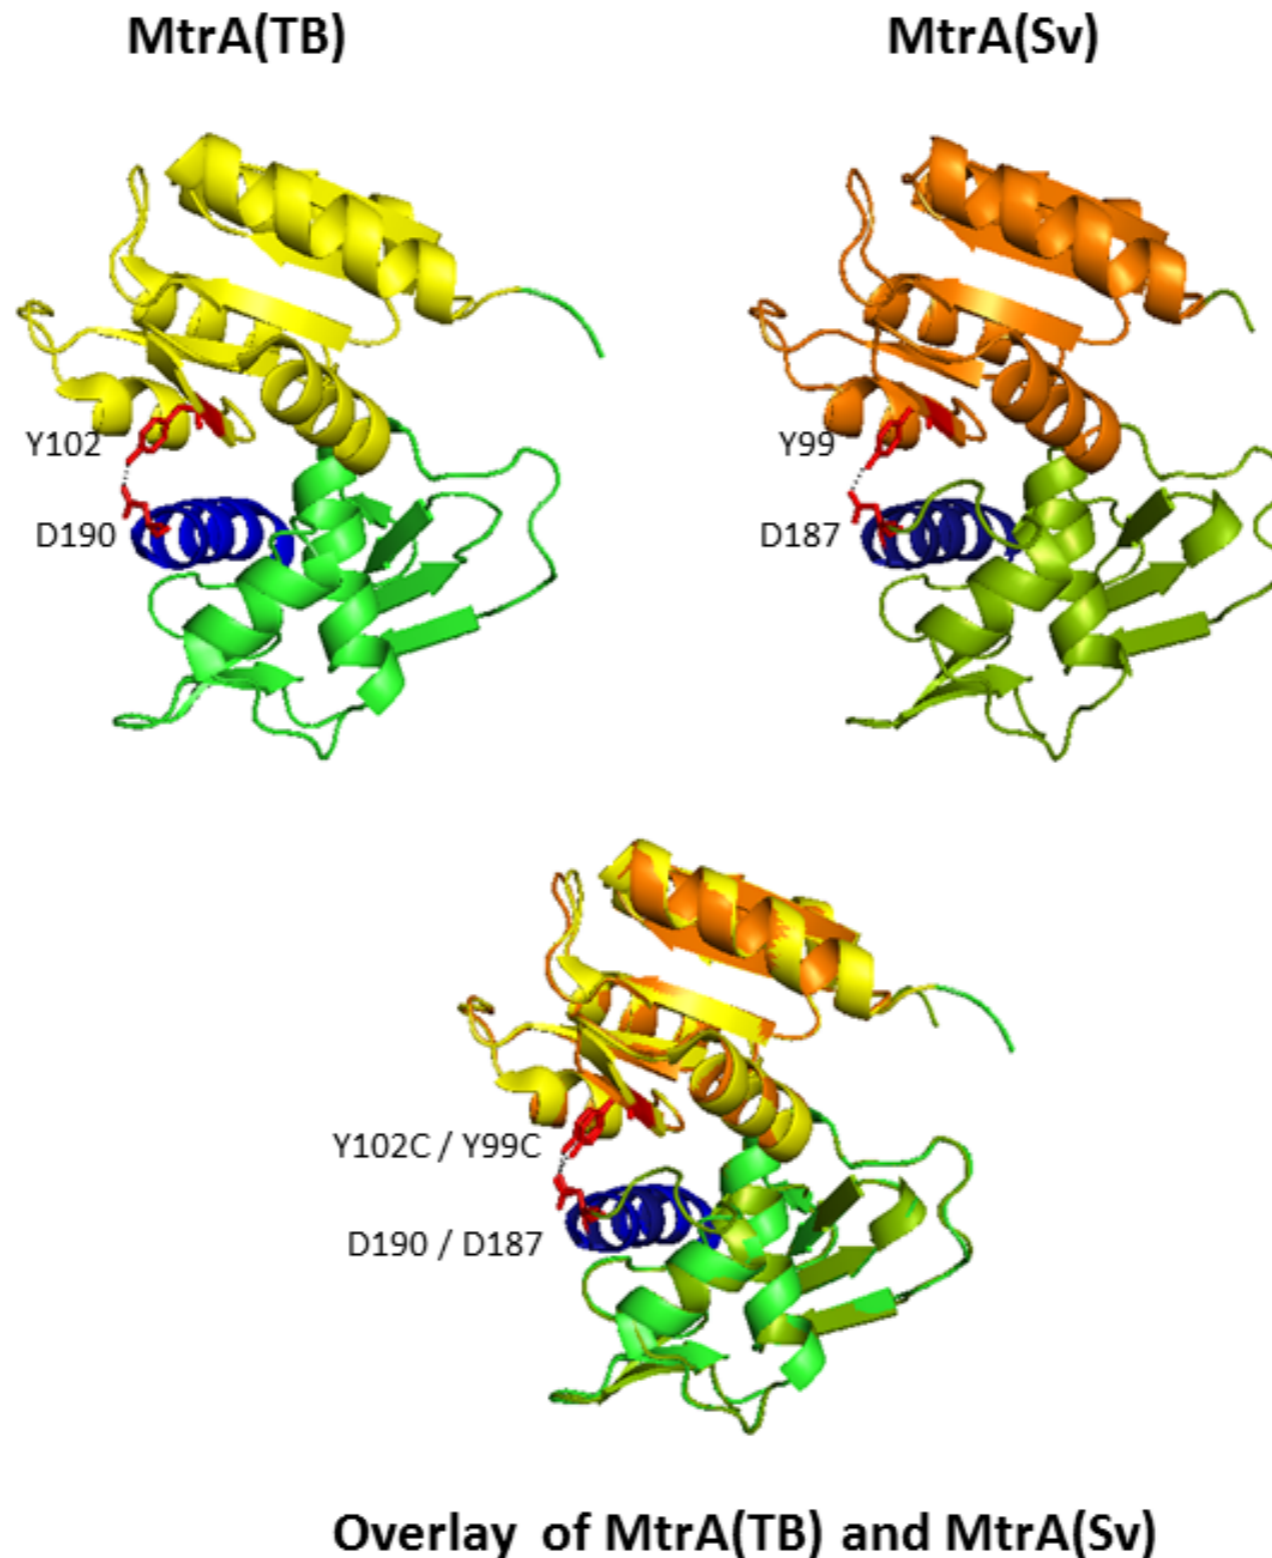

**Table S2.** ChIP-seq and RNA-seq data of target genes involved in development. An enrichment value in the ChIP-seq data below seven is not statistically significant. A fold change less than two fold is not statistically significant in the RNA-seq data.

| SCO no.                                              | SVEN15 no. | Product     | ChIP-seq                         |    |     |     |     |     |        |                 | RNA-seq |                     |                         |      |      |      |      |
|------------------------------------------------------|------------|-------------|----------------------------------|----|-----|-----|-----|-----|--------|-----------------|---------|---------------------|-------------------------|------|------|------|------|
|                                                      |            |             | SVEN                             |    |     |     |     | SCO | strand | distance to TSS | wt      | $\Delta$ mtrB       | 14h                     | 20h  |      |      |      |
|                                                      |            |             | 10                               | 12 | 14  | 16  | 18  | 20  |        |                 | 16      | 14h compared to 20h | wt versus $\Delta$ mtrB |      |      |      |      |
| <b>Genes required for formation of aerial hyphae</b> |            |             |                                  |    |     |     |     |     |        |                 |         |                     |                         |      |      |      |      |
| <i>bldD</i>                                          | SCO1489    | SVEN15_1052 | DNA binding transcription factor |    | 1.7 | 1.5 | 0.5 | 0.1 | 0.3    | 1.7             | 6.0     |                     |                         | -0.6 | 0.5  | -0.5 | 0.6  |
| <b>c-di-GMP</b>                                      |            |             |                                  |    |     |     |     |     |        |                 |         |                     |                         |      |      |      |      |
|                                                      | SCO4931    | SVEN15_4502 | GGDEF domain protein             |    | 8   | 4.8 | 1.6 | 0.3 | 0.8    | 20              | 8.8     | 1                   | -42                     | -4.8 | 0.5  | -4.4 | 0.5  |
| <i>cdgB</i>                                          | SCO4281    | SVEN15_3942 | GGDEF domain protein             |    | 4.8 | 3.5 | 1.5 | 0.4 | 0.4    | 10.7            | 8.3     | 1                   | -58                     | 0.0  | 0.4  | 0.0  | 0.2  |
|                                                      |            | SVEN15_0422 | GGDEF / EAL domain protein       |    | 2.2 | 3   | 2.2 | 1.2 | 1.2    | 3.8             | /       | -1                  | -447                    | 5.4  | 6.2  | 2.1  | 2.9  |
| <i>rmdB</i>                                          | SCO5495    | SVEN15_5058 | GGDEF / EAL domain protein       |    | 5.6 | 2.9 | 0.6 | 0   | 0.5    | 18.9            | 8.3     | 1                   | -465                    | -0.1 | 0.0  | -0.3 | -0.2 |
|                                                      | SCO5511    | SVEN15_5080 | GGDEF / EAL domain protein       |    | 3.8 | 2.8 | 1.7 | 0.8 | 0.8    | 4.3             | 7.5     | 1                   | -160                    | 3.0  | -0.1 | 2.9  | -0.2 |
| <b>Bald phenotype</b>                                |            |             |                                  |    |     |     |     |     |        |                 |         |                     |                         |      |      |      |      |
| <i>bldG</i>                                          | SCO3549    | SVEN15_3247 | putative anti-anti sigma factor  |    | 4.3 | 3.8 | 1.5 |     |        | 9.6             | /       | -1                  | 79                      | -1.9 | -1.0 | -1.6 | -0.7 |
| <i>adpA / bldH</i>                                   | SCO2792    | SVEN15_2524 | DNA binding transcription factor |    | 2.4 | 3.5 | 1.6 | 0.5 | 0.9    | 5.8             | /       | 1                   | -112                    | -0.7 | -3.6 | -0.6 | -3.6 |

|                                       |         |             |                                             |     |     |     |     |     |      |      |    |      |     |      |      |      |
|---------------------------------------|---------|-------------|---------------------------------------------|-----|-----|-----|-----|-----|------|------|----|------|-----|------|------|------|
| <i>bldM</i>                           | SCO4768 | SVEN15_4355 | Two-component RR<br>ECF sigma factor        | 3.6 | 2.7 | 1.3 | 0.4 | 0.9 | 9.1  | 9.5  | 1  | -257 | 0.7 | -2.4 | 1.8  | -1.3 |
| <i>bldN</i>                           | SCO3323 | SVEN15_3116 |                                             | 2.9 | 2.1 | 0.6 | 0.1 | 1.1 | 12.3 | 7.3  | 1  | -141 | 0.5 | -0.9 | 1.2  | -0.1 |
| <b>Genes required for sporulation</b> |         |             |                                             |     |     |     |     |     |      |      |    |      |     |      |      |      |
| <i>whiD</i>                           | SCO4767 | SVEN15_4354 | Putative transcription factor               | 3.8 | 2.7 | 1.3 | 0.4 | 0.9 | 10   | 9.5  | -1 | 176  | 8.3 | 10.6 | -0.8 | 1.6  |
| <i>wblE</i>                           | SCO5240 | SVEN15_4802 |                                             | 2.9 | 3.7 | 1.4 | 0.3 | 1.7 | 9.2  | 8.8  | -1 | 33   | 3.4 | -0.1 | 2.1  | -1.4 |
| <i>wblM</i>                           | SCO6922 | SVEN15_5661 |                                             |     |     |     |     |     |      |      |    |      | 3.0 | -0.1 | 2.7  | -0.4 |
| <i>whiB</i>                           | SCO3034 | SVEN15_2717 | Putative transcription factor               | 3.2 | 2.5 | 1   | 0.3 | 0.9 | 10.6 | 11.3 | -1 | 135  | 2.9 | 0.5  | 2.5  | 0.2  |
| <i>sspA</i>                           | SCO5321 | SVEN15_6651 |                                             |     |     |     |     |     |      |      |    |      | 6.5 | 7.4  | 1.2  | 2.2  |
| <i>whiG</i>                           | SCO5621 | SVEN15_5191 | Sigma factor GntR-like transcription factor | 5.2 | 3.4 | 1.6 | 0.9 | 1.1 | 5    | /    | 1  | -253 | 2.0 | 0.1  | 2.6  | 0.8  |
| <i>whiH</i>                           | SCO5819 | SVEN15_5388 |                                             | 3.3 | 2.9 | 1.3 | 0.2 | 1   | 12   | 7.6  | 1  | 41   | 2.0 | 0.1  | 2.6  | 0.8  |
| <i>whiI</i>                           | SCO6029 | SVEN15_5706 | Two-component RR                            | 8.4 | 5.6 | 2.7 | 0.8 | 1.3 | 20.6 | 17.6 | -1 | 137  | 5.7 | 2.2  | 4.0  | 0.4  |
| <i>ssgA</i>                           | SCO3926 | SVEN15_3615 | putative regulator                          | 1.3 | 1   | 0.4 |     | 0.9 | 8.3  | 7.6  | 1  | -79  | 0.3 | -2.1 | 2.0  | -0.4 |
| <i>ssgB</i>                           | SCO1541 | SVEN15_1102 | putative regulator                          | 5.1 | 3.3 | 1.9 | 1.2 | 1.2 | 11.3 | /    | 1  | -111 | 7.2 | 4.2  | 4.3  | 1.3  |
| <i>ssgD</i>                           | SCO6722 | SVEN15_6261 | putative regulator                          | 2.6 | 2.8 | 1.3 | 0.6 | 0.4 | 2.8  | /    | -1 | 27   | 0.5 | -3.9 | 2.5  | -1.9 |
| <i>ssgE</i>                           | SCO3158 | SVEN15_2937 | putative regulator                          | 4.9 | 3.5 | 1.2 | 0.3 | 0.5 | 15.3 | 8.2  | 1  | -70  | 1.5 | 0.8  | 1.9  | 1.3  |
| <i>ssgG</i>                           | SCO2924 | SVEN15_2622 | putative regulator                          | 8.7 | 4.7 | 1.7 | 0.5 | 0.9 | 6.4  | /    | 1  | -182 | 4.2 | -0.9 | 5.1  | 0.1  |
| <b>Hydrophobic sheath</b>             |         |             |                                             |     |     |     |     |     |      |      |    |      | 0.0 | 0.0  |      |      |



|                                 |         |             |                                                     |     |     |     |     |     |      |      |    |      |      |      |     |      |
|---------------------------------|---------|-------------|-----------------------------------------------------|-----|-----|-----|-----|-----|------|------|----|------|------|------|-----|------|
| <i>chpC</i>                     | SCO1674 | SVEN15_1231 |                                                     |     |     |     |     |     |      |      |    |      | 2.1  | -2.4 | 3.9 | -0.6 |
| <i>chpH</i>                     | SCO1675 | SVEN15_1232 | Hydrophobic                                         | 3.4 | 1.6 | 0.5 |     | 0.6 | 8.6  | /    | -1 | 57   | 3.1  | -0.9 | 3.4 | -0.6 |
| <i>chpE</i>                     | SCO1800 | SVEN15_1396 | cell wall-                                          | 0.4 | 0.8 | 0.6 |     | 0.3 | 1.4  | /    | -1 | 49   | -1.0 | -4.9 | 2.8 | -1.0 |
| <i>chpG</i>                     | SCO2699 | SVEN15_4550 | associated                                          | 2.3 | 2.8 | 1   | 1.8 | 1.2 | 5.6  | /    | 1  | 55   | 3.8  | 1.7  | 3.0 | 0.9  |
| <i>chpF</i>                     | SCO2705 | SVEN15_4546 | proteins                                            | 2.8 | 2.3 | 2   | 1   | 1.6 | 7.8  | 14.1 | 1  | -183 | 7.8  | 4.1  | 5.2 | 1.5  |
| <i>chpD</i>                     | SCO2717 | SVEN15_4533 |                                                     | 3.2 | 2.7 | 1   | 0.5 | 1.1 | 7.5  | /    | 1  | -40  | 2.9  | 1.8  | 2.8 | 1.7  |
| <i>sapB</i>                     | SCO6682 | SVEN15_6339 | Lantibiotic-<br>like peptide<br>surfactant          | 6.8 | 5.2 | 2.3 | 1   | 0.7 | 8.1  | 14.7 | -1 | -12  | 3.3  | -2.2 | 2.5 | -3.0 |
| <i>rdIA</i>                     | SCO2719 | SVEN15_4528 | Secreted cell                                       | 0.2 | 0.6 | 0.6 | 0.3 | 0.5 | 1    | /    | -1 | 60   | 5.8  | 1.3  | 3.0 | -1.5 |
| <i>rdIB</i>                     |         | SVEN15_4531 | wall-                                               | 1.8 | 1.2 | 0.9 | 0.7 | 0.4 | 1.5  | /    | -1 | 46   | 4.5  | 1.2  | 3.2 | 0.0  |
| <i>rdIA</i>                     |         | SVEN15_4532 | associated<br>protein                               | 1.4 | 1.4 | 0.7 | 0.4 | 0.7 | 2.9  | /    | 1  | -21  | 3.8  | 1.2  | 2.9 | 0.3  |
| <b>Cell division initiation</b> |         |             |                                                     |     |     |     |     |     |      |      |    |      |      |      |     |      |
| <i>dnaN / oriC</i>              | SCO3878 | SVEN15_3570 | DNA<br>polymerase III<br>/ origin of<br>replication | 3.1 | 1.5 | 0.4 |     | 0.6 | 6.3  | 6.7  | -1 | 235  | 0.0  | -0.8 | 0.2 | -0.6 |
|                                 |         |             |                                                     | 1.2 | 2.3 |     | 0.1 | 0.7 | 8    | /    | -1 | 611  |      |      |     |      |
| <i>dnaA</i>                     | SCO3879 | SVEN15_3571 | Chromosome<br>replication<br>initiation<br>protein  | 0.7 | 0.9 |     |     |     | 4.5  | /    | -1 | 125  | 0.6  | 0.6  | 0.4 | 0.4  |
| <b>Cell division</b>            |         |             |                                                     |     |     |     |     |     |      |      |    |      |      |      |     |      |
| <i>ftsZ</i>                     | SCO2082 | SVEN15_1692 | Tubulin-like<br>cell division<br>protein            | 4.8 | 4   | 1.5 | 0.5 | 0.6 | 15.5 | 10.2 | -1 | 165  | 0.7  | 0.0  | 1.2 | 0.5  |
| <i>ftsI</i>                     | SCO2090 | SVEN15_1700 | Penicillin<br>binding<br>protein                    |     |     |     |     |     |      |      |    |      | 2.5  | 1.2  | 2.6 | 1.3  |

|                   |         |             |                              |     |     |     |     |     |      |      |    |    |      |      |      |      |
|-------------------|---------|-------------|------------------------------|-----|-----|-----|-----|-----|------|------|----|----|------|------|------|------|
| <i>divIVA</i>     | SCO2077 | SVEN15_1687 | Tip-associated protein       | 1   | 2   | 1   | 0.5 | 0.5 | 8    | /    | -1 | 47 | 1.1  | 0.2  | 0.0  | -1.0 |
| <i>filP</i>       | SCO5396 | SVEN15_4942 | Filament protein             | 3.2 | 2.4 | 1   | 0.4 | 0.5 | 9.8  | 11.5 | -1 | 57 | -0.2 | -1.2 | -1.3 | -2.3 |
| <i>smeA</i>       | SCO1415 | SVEN15_0971 | Small membrane protein       | 5.8 | 4.9 | 1.6 | 0.6 | 1.7 | 21.5 | 15.6 | 1  | 23 | 7.4  | 8.5  | 1.5  | 2.6  |
| <i>sffA</i>       | SCO1416 | SVEN15_0972 | Putative DNA translocase     |     |     |     |     |     |      |      |    |    | 6.3  | 7.8  | 1.8  | 3.3  |
| <i>smc</i>        | SCO5577 | SVEN15_5163 | Chromosome-associated ATPase | 3.2 | 2.5 | 1.1 | 0.9 | 0.9 | 2.4  | 8.4  |    |    | 3.8  | 4.5  | 0.0  | 0.7  |
| <b>mtrAB-lpqB</b> |         |             |                              |     |     |     |     |     |      |      |    |    |      |      |      |      |
| <i>mtrA</i>       | SCO3013 | SVEN15_2696 | Two component RR             | 10  | 7.7 | 2.4 | 1.2 | 1.4 | 19.4 | 6.0  | -1 | 42 | -0.2 | 0.1  | 2.9  | 3.2  |

**Table S3.** Biosynthetic gene clusters (BGCs) predicted by antiSMASH in *S. venezuelae* and MtrA regulation of the cluster. BGCs coloured in amber are bound by MtrA and the regulation is not known or individual genes are positively and negatively regulated, green BGCs are positively regulated, red BGCs are negatively regulated and yellow BGCs are not bound by MtrA. N/S: Not significant.

| BGC | Product                 | SVEN15 Gene no. | ChIP target | RNA-seq LogFC WT/ $\Delta$ mtrB | MtrA regulation |
|-----|-------------------------|-----------------|-------------|---------------------------------|-----------------|
| 1   | Ectoine                 | 0205-8          | 0205        | N/S                             | Not known       |
| 2   | Unknown (PKS/NRPS)      | 0448-72         | 0450        | 1.24 (14h)                      | Positive        |
|     |                         |                 | 0451        | N/S                             | Not known       |
| 3   | Thiazostatin            | 0473-85         | 0473        | N/S                             | Not known       |
|     |                         |                 | 0475        | -0.97 (14h)                     | Negative        |
| 4   | Unknown (Lantibiotic)   | 0506-18         | 0512        | N/S                             | Not known       |
|     |                         |                 | 0513        | N/S                             | Not known       |
|     |                         |                 | 0514        | -3.18 (20h)                     | Negative        |
|     |                         |                 | 0515        | -3.43 (20h)                     | Negative        |
| 5   | Unknown (Lantibiotic)   | 0585-91         | 0585        | N/S                             | Not known       |
|     |                         |                 | 0591        | -1.18 (14h)                     | Negative        |
| 6   | Arcyriaflavin           | 0724-34         | 0725        | N/S                             | Not known       |
|     |                         |                 | 0731        | N/S                             | Not known       |
|     |                         |                 | 0732        | -1.07 (14h)                     | Negative        |
| 7   | Chloramphenicol         | 0877-94         | 0879        | N/S                             | Not known       |
|     |                         |                 | 0878        | -1.59 (14h)                     | Negative        |
|     |                         |                 | 0880        | 3.01 (20h)                      | Positive        |
| 8   | Unknown                 | 1792-832        | 1802        | -0.82 (14h)                     | Negative        |
|     |                         |                 | 1815        | N/S                             | Not known       |
|     |                         |                 | 1820        | N/S                             | Not known       |
|     |                         |                 | 1821        | N/S                             | Not known       |
|     |                         |                 | 1828        | -1.82 (14h)                     | Negative        |
|     |                         |                 | 1830        | N/S                             | Not known       |
| 9   | Desferrioxamine         | 2514-7          | No          | N/S                             | None            |
| 10  | Unknown (Lasso peptide) | 3042-65         | 3043        | N/S                             | Not known       |
| 11  | Unknown                 | 3973-4016       | 4014        | N/S                             | Not known       |
|     |                         |                 | 4016        | 1.15 (20h)                      | Positive        |
| 12  | Unknown (Butyrolactone) | 4085-95         | 4093        | N/S                             | Not known       |
|     |                         |                 | 4094        | -1.49 (14h)                     | Negative        |
|     |                         |                 | 4095        | -1.79 (14h)                     | Negative        |
| 13  | Melanin                 | 4547-57         | 4548        | 0.979 (14h)                     | Positive        |
|     |                         |                 | 4556        | N/S                             | Not known       |
|     |                         |                 | 4557        | 0.991 (20h)                     | Positive        |
| 14  | Unknown (Butyrolactone) | 4983-99         | 4996        | -2.033                          | Negative        |

|    |                       |           |      |             |           |
|----|-----------------------|-----------|------|-------------|-----------|
|    |                       |           | 4998 | N/S         | Not known |
| 15 | Unknown (RiPP)        | 5018-38   | 5028 | 0.76        | Positiv   |
|    |                       |           | 5029 | N/S         | Not known |
| 16 | Flaviolin (predicted) | 5241-73   | 5265 | N/S         | Not known |
| 17 | Unknown (Siderophore) | 5304-15   | 5307 | N/S         | Not known |
|    |                       |           | 5308 | 1.35        | Positive  |
|    |                       |           | 5311 | N/S         | Not known |
| 18 | Unknown (Siderophore) | 5361-72   | 5362 | N/S         | Not known |
| 19 | Unknown (Bacteriocin) | 5709-19   | 5709 | N/S         | Not known |
|    |                       |           | 5712 | N/S         | Not known |
|    |                       |           | 5714 | 2.4 (14h)   | Positive  |
|    |                       |           | 5717 | -2.1 (14h)  | Negative  |
| 20 | Jadomycin             | 5847-73   | 5858 | N/S         | Not known |
|    |                       |           | 5861 | N/S         | Not known |
|    |                       |           | 5863 | N/S         | Not known |
|    |                       |           | 5868 | N/S         | Not known |
| 21 | Unknown (NRPS)        | 5995-6029 | 5995 | N/S         | Not known |
|    |                       |           | 6000 | N/S         | Not known |
|    |                       |           | 6008 | N/S         | Not known |
|    |                       |           | 6009 | N/S         | Not known |
|    |                       |           | 6010 | -2.09 (14h) | Negative  |
|    |                       |           | 6012 | N/S         | Not known |
| 22 | Unknown (NRPS)        | 6050-77   | 6052 | -1.72 (14h) | Negative  |
|    |                       |           | 6053 | -0.79 (14h) | Negative  |
|    |                       |           | 6063 | -0.92 (20h) | Negative  |
| 23 | Unknown (NRPS)        | 6101-25   | 6101 | N/S         | Not known |
|    |                       |           | 6108 | -0.89       | Negative  |
|    |                       |           | 6109 | N/S         | Not known |
|    |                       |           | 6111 | 1           | Positive  |
|    |                       |           | 6120 | -1.19       | Negative  |
|    |                       |           | 6124 | 0.88        | Positive  |
|    |                       |           | 6125 | N/S         | Not known |
| 24 | Hopanoids             | 6296-6320 | 6296 | N/S         | Not known |
|    |                       |           | 6297 | 2.15 (14h)  | Positive  |
|    |                       |           | 6311 | 0.84 (20h)  | Positive  |
|    |                       |           | 6315 | N/S         | Not known |
|    |                       |           | 6316 | N/S         | Not known |
|    |                       |           | 6317 | -3.17       | Negative  |
| 25 | Unknown (Bacteriocin) | 6385-6393 | 6385 | 1.31        | Positive  |
|    |                       |           | 6390 | 1.79        | Positive  |

|    |                             |           |      |                                                  |                    |
|----|-----------------------------|-----------|------|--------------------------------------------------|--------------------|
| 26 | Spore pigment               | 6643-6652 | No   | All genes >1 in $\Delta$ mtrB except 6652 at 20h | Indirect, positive |
| 27 | Melanin                     | 6688-6695 | 6688 | -0.9                                             | Negative           |
|    |                             |           | 6689 | -3.41                                            | Negative           |
| 28 | Unknown (siderophore; NRPS) | 6883-6907 | 6901 | N/S                                              | Not known          |
|    |                             |           | 6904 | N/S                                              | Not known          |
| 29 | 2-methylisoborneol          | 6950-67   | 6951 | 0.971 (20h)                                      | Positive           |
|    |                             |           | 6964 | N/S                                              | Not known          |
|    |                             |           | 6966 | 2.65 (14h)                                       | Positive           |
|    |                             |           | 6968 | N/S                                              | Not known          |
| 30 | Venemycin                   | 7070-103  | 7074 | 1.27 (14h)                                       | Positive           |
|    |                             |           | 7080 | N/S                                              | Not known          |
|    |                             |           | 7083 | N/S                                              | Not known          |
|    |                             |           | 7092 | 0.86 (14h) / 1.40 (20h)                          | Positive           |
|    |                             |           | 7103 | N/S                                              | Not known          |
| 31 | Unknown                     | 7258-63   | No   | N/S                                              | None               |

**Table S4. BGCs in *S. coelicolor* and genes within the cluster bound by MtrA.** Green indicates there is at least one MtrA target gene in the BGC, red indicates no MtrA binding sites and amber indicates indirect regulation by MtrA as judged by LCMS (BGCs 9 and 26, Figure 6) and CHIP (BGC 9, MtrA binds upstream of *desR* which is situated outside this BGC but represses its expression, see Figure S9).

| BGC | Product                           | Genes        | CHIP target                       | Reference                     |
|-----|-----------------------------------|--------------|-----------------------------------|-------------------------------|
| 1   | Eicosapentaenoic acid (predicted) | SCO0124-29   | SCO0126, 27                       | 1                             |
| 2   | Isorenieratene (Carotenoid)       | SCO0185-91   | SCO0185                           | 1                             |
| 3   | Unknown (Lantipeptide)            | SCO0247-0279 | SCO0249, 50, 52, 53, 61, 68, 75   | <i>AntiSMASH</i> <sup>2</sup> |
| 4   | Coelichelin                       | SCO0489-99   | SCO0489, 90                       | 1                             |
| 5   | Unknown (Bacteriocin)             | SCO0750-756  | /                                 | <i>AntiSMASH</i> <sup>2</sup> |
| 6   | Flaviolin                         | SCO1185-1226 | SCO1185, 87, 95, 1200, 01, 09, 10 | <i>AntiSMASH</i> <sup>2</sup> |
| 7   | Ectoine                           | SCO1864-67   | SCO864                            | <i>AntiSMASH</i> <sup>2</sup> |
| 8   | Melanin                           | SCO2693-2707 | SCO2705, 06                       | <i>AntiSMASH</i> <sup>2</sup> |
| 9   | Desferrioxamine                   | SCO2782-85   | /                                 | 1                             |
| 10  | Calcium Dependent Antibiotic      | SCO3210-3249 | SCO3229, 30, 32, 34, 36, 41       | 1                             |
| 11  | Actinorhodin                      | SCO5071-92   | SCO5082, 83, 85                   | 1                             |
| 12  | Albaflavenone                     | SCO5212-5231 | SCO5217                           | 3                             |
| 13  | Spore pigment                     | SCO5314-5320 | /                                 | 1                             |
| 14  | Unknown (Siderophore)             | SCO5799-5801 | SCO5801                           | 1                             |
| 15  | Undecylprodigiosin                | SCO5877-5898 | SCO5881, 83, 86                   | 1                             |
| 16  | Unknown (Bacteriocin)             | SCO6041-52   | SCO6042, 44, 49, 50               | <i>AntiSMASH</i> <sup>2</sup> |
| 17  | Geosmin                           | SCO6064-81   | SCO6080                           | <i>AntiSMASH</i> <sup>2</sup> |
| 18  | Unknown (Siderophore)             | SCO6221-32   | SCO6222, 23, 26, 27               | <i>AntiSMASH</i> <sup>2</sup> |
| 19  | Coelimycin (Cpk)                  | SCO6273-88   | SCO6273, 80                       | 1,3                           |

|    |                        |              |                     |                        |
|----|------------------------|--------------|---------------------|------------------------|
| 20 | Unknown (NRPS)         | SCO6429-38   | /                   | 3                      |
| 21 | SapB                   | SCO6668-87   | SCO6671, 75, 76, 83 | AntiSMASH <sup>2</sup> |
| 22 | Hopanoids              | SCO6759-71   | SCO6772             | 3                      |
| 23 | Unknown (PKS)          | SCO6826-27   | /                   | 1                      |
| 24 | Unknown (Lantipeptide) | SCO6921-43   | /                   | AntiSMASH <sup>2</sup> |
| 25 | Unknown                | SCO7176-7200 | SCO7176, 77         | AntiSMASH <sup>2</sup> |
| 26 | Germicidin             | SCO7221      | /                   | 3                      |
| 27 | Unknown                | SCO7454-77   | SCO7462, 63, 68     | AntiSMASH <sup>2</sup> |
| 28 | Coelibactin            | SCO7681-91   | SCO7681, 82, 84, 87 | 1                      |
| 29 | 2-methylisoborneol     | SCO7700-1    | /                   | 3,4                    |

### References.

1. Bentley, S. D. *et al.* Complete genome sequence of the model actinomycete *Streptomyces coelicolor* A3(2). *Nature* **417**, 141–147 (2002).
2. Weber, T. *et al.* antiSMASH 3.0-a comprehensive resource for the genome mining of biosynthetic gene clusters. *Nucleic Acids Res* **43**, W237–43 (2015).
3. Challis, G. L. Exploitation of the *Streptomyces coelicolor* A3(2) genome sequence for discovery of new natural products and biosynthetic pathways. *J Ind Microbiol Biotechnol* (2013). doi:10.1007/s10295-013-1383-2
4. van Keulen, G. & Dyson, P. J. in **89**, 217–266 (Elsevier, 2014).

**Table S6** Bacterial strains

| Strain                             | Description                                                                                                                                                                                                         | Plasmid | Resistance                         | Reference                  |
|------------------------------------|---------------------------------------------------------------------------------------------------------------------------------------------------------------------------------------------------------------------|---------|------------------------------------|----------------------------|
| <i>E. coli</i>                     |                                                                                                                                                                                                                     |         |                                    |                            |
| Top10                              | F– <i>mcrA</i> Δ( <i>mrr-hsdRMS-mcrBC</i> ) Φ80 <i>lacZ</i> ΔM15 Δ <i>lacX74</i><br><i>recA1 araD139</i> Δ( <i>ara leu</i> ) 7697 <i>galU galK rpsL</i> (StrR)<br><i>endA1 nupG</i>                                 |         |                                    | Invitrogen™                |
| BW25113                            | λ <sup>-</sup> , Δ( <i>araD-araB</i> )567, Δ <i>lacZ</i> 4787(:: <i>rrnB-4</i> ), <i>lacIp-4000</i> ( <i>lacIQ</i> ), <i>rpoS</i> 369( <i>Am</i> ), <i>rph-1</i> , Δ( <i>rhaD-rhaB</i> )568,<br><i>hsdR</i> 514     | pIJ790  | CmI <sup>R</sup>                   | 1                          |
| ET12567                            | <i>dam</i> <sup>-</sup> <i>dcm</i> <sup>-</sup> <i>hsdS</i> <sup>-</sup>                                                                                                                                            | pUZ8002 | CmI <sup>R</sup> /Tet <sup>R</sup> | 1                          |
| BL21 λDE3                          | <i>fhuA2</i> [ <i>lon</i> ] <i>ompT gal</i> (λ DE3) [ <i>dcm</i> ] Δ <i>hsdS</i> λ DE3 = λ<br><i>sBamHI</i> Δ <i>EcoRI-B int</i> ::( <i>lacI</i> :: <i>PlacUV5</i> :: <i>T7 gene1</i> ) <i>i21</i><br>Δ <i>nin5</i> |         |                                    |                            |
| <i>S. coelicolor</i>               |                                                                                                                                                                                                                     |         |                                    |                            |
| M145                               | SCP1 <sup>-</sup> SCP2 <sup>-</sup> Pgl <sup>+</sup>                                                                                                                                                                |         |                                    | 2                          |
| Δ <i>mtrB</i>                      | M145 <i>mtrB</i> :: <i>scar</i>                                                                                                                                                                                     |         |                                    | This work                  |
| NS0171                             | M145 <i>mtrA</i> :: <i>scar</i> ΦBT1 <i>mtrAp mtrA</i> -3xFlag                                                                                                                                                      | pNS109  |                                    | This work                  |
| <i>S. venezuelae</i>               |                                                                                                                                                                                                                     |         |                                    |                            |
| <i>S. venezuelae</i><br>ATCC 10712 | Wild-type                                                                                                                                                                                                           |         |                                    | John Innes Centre, Norwich |
| NS003                              | ΦBT1 <i>mtrAp mtrA</i> -3xFlag                                                                                                                                                                                      | pNS109  | Hyg <sup>R</sup>                   | This work                  |
| NS012, NS021<br>and NS022          | <i>mtrB</i> :: <i>aac(3)IV oriT</i>                                                                                                                                                                                 |         | Apr <sup>R</sup>                   | This work                  |



|       |                                                           |          |                                     |           |
|-------|-----------------------------------------------------------|----------|-------------------------------------|-----------|
| NS013 | ΦBT1 <i>mtrAp mtrA</i> (TB)                               | pNS103   | Hyg <sup>R</sup>                    | This work |
| NS016 | ΦBT1 <i>mtrAp mtrA</i> (TB) <sub>Y102C</sub>              | pNS104   | Hyg <sup>R</sup>                    | This work |
| NS029 | ΦBT1 pMS82                                                | pMS82    | Hyg <sup>R</sup>                    | This work |
| NS033 | ΦBT1 <i>ermE*</i> <i>mtrA</i>                             | pNS102   | Hyg <sup>R</sup>                    | This work |
| NS036 | ΦBT1 pIJ10257                                             | pIJ10257 | Hyg <sup>R</sup>                    | This work |
| NS039 | ΦBT1 <i>mtrAp mtrA</i>                                    | pNS108   | Hyg <sup>R</sup>                    | This work |
| NS042 | <i>mtrA::aac(3)IV oriT</i> ΦBT1 <i>mtrAp mtrA</i> -3xFlag | pNS109   | Apr <sup>R</sup> / Hyg <sup>R</sup> | This work |
| NS052 | <i>mtrA::aac(3)IV oriT</i> ΦBT1 <i>mtrAp mtrA</i>         | pNS108   | Apr <sup>R</sup> / Hyg <sup>R</sup> | This work |
| NS093 | <i>mtrB::aac(3)IV oriT</i> ΦBT1 <i>mtrAp mtrB</i>         | pNS107   | Apr <sup>R</sup> / Hyg <sup>R</sup> | This work |
| NS099 | ΦBT1 <i>mtrAp mtrA</i> <sub>Y99C</sub>                    | pNS105   | Hyg <sup>R</sup>                    | This work |

**Table S7.** Plasmids and cosmids used in this work

| Plasmids  | Genotype/description                                                      | Resistance       | Reference                  |
|-----------|---------------------------------------------------------------------------|------------------|----------------------------|
| pIJ773    | <i>aac(3)IV oriT bla</i>                                                  | Apr <sup>R</sup> | 1                          |
| pIJ790    | <i>araC-Parab, Y, β, exo, cat, repA1001ts, oriR101</i>                    | Cml <sup>R</sup> | 1                          |
| pUZ8002   | RK2 derivative with a mutation in <i>oriT</i>                             | Kan <sup>R</sup> | 1                          |
| pMS82     | <i>ori</i> , pUC18, <i>hyg, oriT</i> , RK2, int ΦBT1                      | Hyg <sup>R</sup> | 3                          |
| pIJ10770  | <i>ori</i> , pUC18, <i>hyg, oriT</i> , RK2, int ΦBT1 Δ <i>aac(3)IVp</i>   | Hyg <sup>R</sup> | S Schlimpert, unpublished  |
| pIJ10257  | <i>oriT</i> , ΦBT1 <i>attB-int</i> , Hygr, <i>ermEp*</i> , pMS81 backbone | Hyg <sup>R</sup> | John Innes Centre, Norwich |
| pNS074    | pETduet-1 <i>mtrA</i> (Sv)                                                | Amp <sup>R</sup> | This work                  |
| pETduet-1 | f1 origin, T7 <i>lac, lacI, ori</i> with two multiple cloning sites       | Amp <sup>R</sup> | Novagen™                   |
| pNS100    | pETduet-1 <i>mtrA</i> His-Cterm                                           | Kan <sup>R</sup> | This work                  |
| pNS102    | pIJ10257 <i>mtrA</i>                                                      | Hyg <sup>R</sup> | This work                  |
| pNS103    | pIJ10770 <i>mtrAp mtrA</i> (TB)                                           | Hyg <sup>R</sup> | This work                  |

|                |                                                                        |                  |                            |
|----------------|------------------------------------------------------------------------|------------------|----------------------------|
| pNS104         | pIJ10770 <i>mtrAp mtrA</i> (TB) <sub>Y102C</sub>                       | Hyg <sup>R</sup> | This work                  |
| pNS105         | pIJ10770 <i>mtrAp mtrA</i> (Sv) <sub>Y99C</sub>                        | Hyg <sup>R</sup> | This work                  |
| pNS106         | pMS82 <i>mtrAp lpqB</i>                                                | Hyg <sup>R</sup> | This work                  |
| pNS107         | pIJ10770 <i>mtrAp mtrB</i>                                             | Hyg <sup>R</sup> | This work                  |
| pNS108         | pMS82 <i>mtrAp mtrA</i>                                                | Hyg <sup>R</sup> | This work                  |
| pNS109         | pIJ10770 <i>mtrAp mtrA</i> -3xFlag                                     | Hyg <sup>R</sup> | This work                  |
| <b>Cosmids</b> |                                                                        |                  |                            |
| SV-6-A04       | Supercos-1 + 40.2kbp chromosomal fragment containing <i>mtrAB-lpqB</i> |                  | John Innes Centre, Norwich |
| pNS069         | SV-6-A04 <i>lpqB:: aac(3)IV oriT</i>                                   |                  | This work                  |
| pNS070         | SV-6-A04 <i>mtrB:: aac(3)IV oriT</i>                                   |                  | This work                  |
| pNS071         | SV-6-A04 <i>mtrA:: aac(3)IV oriT</i>                                   |                  | This work                  |

**Table S8.** Primers used in this work

| Primer | Description                                                    | Sequence                                                        |
|--------|----------------------------------------------------------------|-----------------------------------------------------------------|
| NS-040 | <i>mtrA</i> (SVEN15_2696) forward disruption primer (Redirect) | GCCTTGAGACTGATACGGAAATGGGATGATGTCGATATGATTCCGG<br>GGATCCGTCGACC |
| NS-041 | <i>mtrA</i> (SVEN15_2696) reverse disruption primer (Redirect) | TCCCCGGGCTTCGGAGCAGCACTGCCTGTACTCATGTCATGTAGGC<br>TGGAGCTGCTTC  |
| NS-044 | <i>mtrB</i> (SVEN15_2695) forward disruption primer (Redirect) | TCCGTGGTGTCTGGGTACAAGGCGGGACCGAGCTGACATGATTCCG<br>GGATCCGTCGACC |
| NS-080 | <i>mtrB</i> (SVEN15_2695) reverse disruption primer (Redirect) | CTCCCGCACCCACCGTCCCGCTCGGGCGTCAGCGCCCACTGTAGGC<br>TGGAGCTGCTTC  |
| NS-131 | <i>mtrA</i> (SVEN15_2696) forward test primer -141             | TGA CAT CCA TGT CTG GCA TCA ACA CCC A                           |
| NS-132 | <i>mtrA</i> (SVEN15_2696) reverse test primer -120             | CGA CGA TCC TCA GCT GGA TGT TCC GT                              |
| NS-070 | <i>mtrB</i> (SVEN15_2695) forward test primer -100             | CAC GTC CAG CGG CTG CGC TCG AAG G                               |
| NS-071 | <i>mtrB</i> (SVEN15_2695) reverse test primer -100             | GTC GGG CAT GGT CGC GCA CCC GGT G                               |
| P1     | <i>aac(3)IV</i> resistance cassette test primer                | ATT CCG GGG ATC CGT CGA CC                                      |
| P2     | <i>aac(3)IV</i> resistance cassette test primer                | TGT AGG CTG GAG CTG CTT C                                       |

|                       |                                                         |                                                            |
|-----------------------|---------------------------------------------------------|------------------------------------------------------------|
| NS-064                | pMS82 forward test primer                               | GCA ACA GTG CCG TTG ATC GTG CTA TG                         |
| NS-065                | pMS82 reverse test primer                               | GCC AGT GGT ATT TAT GTC AAC ACC GCC                        |
| NS-115                | <i>mtrA</i> (SVEN15_2696) NdeI forward                  | GCGCATATGATGAAGGGACGCGTT                                   |
| NS-116                | <i>mtrA</i> (SVEN15_2696) HindIII reverse               | GCGAAGCTTTTCAGCTCGGTCCCGC                                  |
| NS-121                | pIJ10257 forward test primer                            | AGGTACCAGCCCGACCCG                                         |
| NS-122                | pIJ10257 reverse test primer                            | ATCAGCGAGCTGAAGAAA                                         |
| NS-123                | <i>mtrA</i> (SVEN15_2696) HindIII forward 1             | GCGAAGCTTCCG TGG GCC GGT CCC GCC TC                        |
| NS-124                | <i>mtrA</i> (SVEN15_2696) KpnI reverse                  | GCGGGTACCTCAGCTCGGTCCCGCCTTGT                              |
| NS-125                | <i>mtrB</i> (SVEN15_2695) reverse 2                     | CGGAGCAGCACTGCCTGTACTCATATCGACATCATCCCATT                  |
| NS-126                | <i>mtrB</i> (SVEN15_2695) forward 3                     | ATGAGTACAGGCAGTGCTGCTCCGAAGCCC                             |
| NS-127                | <i>mtrB</i> (SVEN15_2695) NsiI reverse 4                | GCGATGCATTCAGCGCCCACGTGTCTGT                               |
| NS-145                | <i>mtrA</i> (SVEN15_2696) forward BamHI (pETduet)       | GGATCCTAAAGGCCGCGTTCTGGTCGTC                               |
| NS-146                | <i>mtrA</i> (SVEN15_2696) reverse HindIII (pETduet)     | AAGCTT TCAGCTCGGTCCCGCCTTGTACC                             |
| NS-160                | <i>mtrB</i> (SVEN15_2695) forward internal test primers | TTCAACGTGGTCGCGCTCTCCCTCG                                  |
| NS-161                | <i>mtrB</i> (SVEN15_2695) reverse internal test primers | GCCAGCTTCACCACGACGTCCTTGC                                  |
| NS-166                | pET28a(+) forward test primers                          | CTCGATCCCGCGAAATTAATACGAC                                  |
| NS-167                | pET28a(+) reverse test primers                          | GGGCTTTGTTAGCAGCCGGATC                                     |
| NS-283                | pSS170 forward test primer                              | CGGGGTCTGACGCTCAGTGGAACGAAA                                |
| Universal<br>M13-6FAM | Forward                                                 | GTAAAACGACGGCCAGT                                          |
| Labelled<br>Primers   | Reverse                                                 | CAGGAAACAGCTATGAC                                          |
| NS-176                | M13FAM nested SVEN15_0205p ( <i>ectA</i> )forward       | CTA AAA CGA CGG CCA GTC ACC GAA CGG AGC CGG GC             |
| NS-177                | M13FAM nested SVEN15_0205p ( <i>ectA</i> )reverse       | CAG GAA ACA GCT ATG AGG GCG CCG AAG GTA CCG A              |
| NS-286                | M13FAM nested SVEN15_3571p ( <i>dnaA</i> ) forward      | <b>CTA AAA CGA CGG CCA GTC</b> GGT TCG CAA GGA TGG CTC GGC |

|        |                                                     |                                                                    |
|--------|-----------------------------------------------------|--------------------------------------------------------------------|
| NS-287 | M13FAM nested SVEN15_3571p ( <i>dnaA</i> ) reverse  | <b>CAG GAA ACA GCT ATG ACT GCG GCA AGA TCA GCA GGA ACG<br/>TCA</b> |
| NS-294 | M13FAM nested SVEN15_0880p ( <i>cmlR2</i> ) forward | <b>CTA AAA CGA CGG CCA GTG AAA AAG CTC CAA CTA CAT CGC<br/>AGA</b> |
| NS-295 | M13FAM nested SVEN15_0880p ( <i>cmlR2</i> ) reverse | <b>CAG GAA ACA GCT ATG ACC CAT CAT GAT CAT GGC TGT CTG<br/>GTG</b> |

---

---

## References

1. Gust, B., Challis, G. L., Fowler, K., Kieser, T. & Chater, K. F. (2003). PCR-targeted *Streptomyces* gene replacement identifies a protein domain needed for biosynthesis of the sesquiterpene soil odor geosmin. *Proc Natl Acad Sci USA* **100**, 1541–1546.
2. Kieser, T., Bibb, M. J., Buttner, M. J., Chater, K. F. & Hopwood, D. A. (2000) *Practical Streptomyces Genetics*, John Innes Centre, Norwich, UK.
3. Gregory, M. A., Till, R. & Smith, M. C. M. (2003) Integration site for *Streptomyces* phage phiBT1 and development of site-specific integrating vectors. *J Bacteriol* **185**, 5320–5323.
